# Supplementary material for: Strategy of Transcription Regulation in the Budding Yeast
Source: PLOS journal article supplement (doi:10.1371/journal.pone.0000250), 2007-02-27
Supplement: S2 (10.1371/journal.pone.0000250.s002) [file journal.pone.0000250.s002]

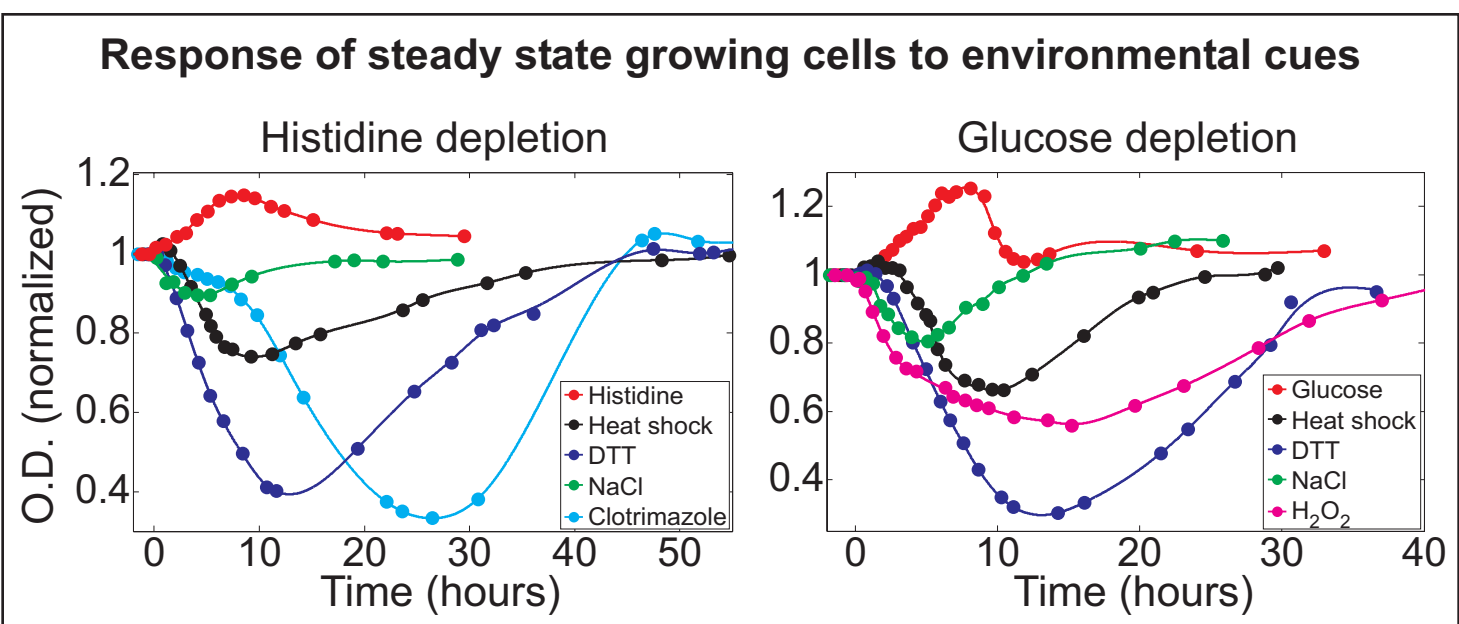

**Figure S2.** Response of cells grown in steady state to environmental perturbations. The markers designate O.D. sampling time, and solid lines are spline interpolations of the data. The Y-axis is normalized such that the steady state O.D. (at  $t < 0$ ) is 1. Cells were examined in two chemostat environments. Cells in a histidine-limited chemostat were subjected to the following 5 environmental cues: Clotrimazole (10 $\mu$ M - cyan curve), DTT (6mM - blue curve), NaCl (0.31M - green curve), heat shock (37°C for 5 hours - black curve), and a stress-relieving pulse of histidine (2 mg/l - red curve). Cells in a glucose-limited chemostat were subjected to the following 5 environmental cues: H<sub>2</sub>O<sub>2</sub> (0.6mM - magenta curve), DTT (6mM - blue curve), NaCl (0.4M - green curve), heat shock (39°C for 5 hours - black curve), and a stress-relieving pulse of glucose (0.2 g/l - red curve).
